# Supplementary material for: Bead injection for biomolecular assays: Affinity chromatography enhanced by bead injection spectroscopy
Source: Royal Society of Chemistry journal article supplement (doi:10.1039/b605112j), 2006-01-01
Supplement: b605112j.pdf [file b605112j.pdf]

**Electronic Supplementary Information (Paper Ref.: B605112J)**

**Table 1. Software protocol for assay using micro-Affinity Chromatography**

|                                                                                                                                                                                                                                                                                                                                                                                                                                                                                                                                                                                                                                                                                                                                                                                                                                                                                                                                                                                                                                                                                                                                                                                                                                                                                                                                                                                                                                                                                                                                                                                                                                                                                                                                                                                                                                                                                                                                                                                                                                                                                                            |                                                                                                                                                                                                                                                                                                                                                                                                                                                                                                                                                                                                                                                                                                                                                                                                                                                                                                                                                                                                                                                                                                                                                                                                                                                                                                                                                                                                                                                                                                                                                                                                                                                                                                                                                                                                                                                                  |
|------------------------------------------------------------------------------------------------------------------------------------------------------------------------------------------------------------------------------------------------------------------------------------------------------------------------------------------------------------------------------------------------------------------------------------------------------------------------------------------------------------------------------------------------------------------------------------------------------------------------------------------------------------------------------------------------------------------------------------------------------------------------------------------------------------------------------------------------------------------------------------------------------------------------------------------------------------------------------------------------------------------------------------------------------------------------------------------------------------------------------------------------------------------------------------------------------------------------------------------------------------------------------------------------------------------------------------------------------------------------------------------------------------------------------------------------------------------------------------------------------------------------------------------------------------------------------------------------------------------------------------------------------------------------------------------------------------------------------------------------------------------------------------------------------------------------------------------------------------------------------------------------------------------------------------------------------------------------------------------------------------------------------------------------------------------------------------------------------------|------------------------------------------------------------------------------------------------------------------------------------------------------------------------------------------------------------------------------------------------------------------------------------------------------------------------------------------------------------------------------------------------------------------------------------------------------------------------------------------------------------------------------------------------------------------------------------------------------------------------------------------------------------------------------------------------------------------------------------------------------------------------------------------------------------------------------------------------------------------------------------------------------------------------------------------------------------------------------------------------------------------------------------------------------------------------------------------------------------------------------------------------------------------------------------------------------------------------------------------------------------------------------------------------------------------------------------------------------------------------------------------------------------------------------------------------------------------------------------------------------------------------------------------------------------------------------------------------------------------------------------------------------------------------------------------------------------------------------------------------------------------------------------------------------------------------------------------------------------------|
| <p><b>‘1) LOAD BEADS</b><br/>           Syringe Pump Valve In<br/>           Syringe Pump Flowrate (<math>\mu\text{L}/\text{sec}</math>) 200<br/>           Syringe Pump Aspirate (<math>\mu\text{L}</math>) 400<br/>           Syringe Pump Delay Until Done<br/>           Syringe Pump Valve Out<br/>           Valve beads<br/>           Syringe Pump Flowrate (<math>\mu\text{L}/\text{sec}</math>) 50<br/>           Syringe Pump Aspirate (<math>\mu\text{L}</math>) 50<br/>           Syringe Pump Delay Until Done<br/>           Valve micro-column<br/>           Syringe Pump Flowrate (<math>\mu\text{L}/\text{sec}</math>) 20<br/>           Syringe Pump Dispense (<math>\mu\text{L}</math>) 100<br/>           Syringe Pump Delay Until Done<br/>           Valve waste<br/>           Syringe Pump Flowrate (microliter/sec) 200<br/>           Syringe Pump Empty<br/>           Syringe Pump Delay Until Done</p> <p><b>‘2) WASH COLUMN AND FLOW CELL, FOLLOWED BY REFERENCE SCAN</b><br/>           Syringe Pump Valve In<br/>           Syringe Pump Flowrate (<math>\mu\text{L}/\text{sec}</math>) 200<br/>           Syringe Pump Fill<br/>           Syringe Pump Delay Until Done<br/>           Syringe Pump Valve Out<br/>           Valve micro-column<br/>           Syringe Pump Flowrate (<math>\mu\text{L}/\text{sec}</math>) 20<br/>           Syringe Pump Dispense (microliter) 50<br/>           Syringe Pump Delay Until Done<br/>           Valve flow cell<br/>           Syringe Pump Flowrate (microliter/sec) 80<br/>           Syringe Pump Dispense (microliter) 80<br/>           Syringe Pump Delay Until Done<br/>           Spectrometer Reference Scan</p> <p><b>‘3) LOAD &amp; MONITOR SAMPLE</b><br/>           Spectrometer Absorbance Scanning<br/>           Syringe Pump Valve Out<br/>           Valve sample<br/>           Syringe Pump Flowrate (<math>\mu\text{L}/\text{sec}</math>) 20<br/>           Syringe Pump Aspirate (<math>\mu\text{L}</math>) 20<br/>           Syringe Pump Delay Until Done<br/>           Valve micro-column</p> | <p>Syringe Pump Flowrate (<math>\mu\text{L}/\text{sec}</math>) 1<br/>           Syringe Pump Dispense (microliter) 100<br/>           Syringe Pump Delay Until Done</p> <p><b>‘4) ELUTION #1</b><br/>           Valve Eluant<br/>           Syringe Pump Flowrate (microliter/sec) 20<br/>           Syringe Pump Aspirate (microliter) 20<br/>           Syringe Pump Delay Until Done<br/>           Valve micro-column<br/>           Syringe Pump Flowrate (microliter/sec) 1<br/>           Syringe Pump Dispense (microliter) 100<br/>           Syringe Pump Delay Until Done</p> <p><b>‘5) ELUTION #2</b><br/>           Valve Eluant<br/>           Syringe Pump Flowrate (microliter/sec) 20<br/>           Syringe Pump Aspirate (microliter) 20<br/>           Syringe Pump Delay Until Done<br/>           Valve micro-column<br/>           Syringe Pump Flowrate (microliter/sec) 1<br/>           Syringe Pump Dispense (microliter) 100<br/>           Syringe Pump Delay Until Done<br/>           Spectrometer Stop Scanning<br/>           Valve waste<br/>           Syringe Pump Flowrate (microliter/sec) 100<br/>           Syringe Pump Empty<br/>           Syringe Pump Delay Until Done</p> <p><b>‘6) REMOVE BEADS</b><br/>           Syringe Pump Valve In<br/>           Syringe Pump Flowrate (microliter/sec) 200<br/>           Syringe Pump Aspirate (microliter) 300<br/>           Syringe Pump Delay Until Done<br/>           Syringe Pump Valve Out<br/>           Valve micro-column<br/>           Syringe Pump Flowrate (microliter/sec) 20<br/>           Syringe Pump Aspirate (microliter) 200<br/>           Syringe Pump Delay Until Done<br/>           Valve waste<br/>           Syringe Pump Flowrate (microliter/sec) 200<br/>           Syringe Pump Empty<br/>           Syringe Pump Delay Until Done</p> |
|------------------------------------------------------------------------------------------------------------------------------------------------------------------------------------------------------------------------------------------------------------------------------------------------------------------------------------------------------------------------------------------------------------------------------------------------------------------------------------------------------------------------------------------------------------------------------------------------------------------------------------------------------------------------------------------------------------------------------------------------------------------------------------------------------------------------------------------------------------------------------------------------------------------------------------------------------------------------------------------------------------------------------------------------------------------------------------------------------------------------------------------------------------------------------------------------------------------------------------------------------------------------------------------------------------------------------------------------------------------------------------------------------------------------------------------------------------------------------------------------------------------------------------------------------------------------------------------------------------------------------------------------------------------------------------------------------------------------------------------------------------------------------------------------------------------------------------------------------------------------------------------------------------------------------------------------------------------------------------------------------------------------------------------------------------------------------------------------------------|------------------------------------------------------------------------------------------------------------------------------------------------------------------------------------------------------------------------------------------------------------------------------------------------------------------------------------------------------------------------------------------------------------------------------------------------------------------------------------------------------------------------------------------------------------------------------------------------------------------------------------------------------------------------------------------------------------------------------------------------------------------------------------------------------------------------------------------------------------------------------------------------------------------------------------------------------------------------------------------------------------------------------------------------------------------------------------------------------------------------------------------------------------------------------------------------------------------------------------------------------------------------------------------------------------------------------------------------------------------------------------------------------------------------------------------------------------------------------------------------------------------------------------------------------------------------------------------------------------------------------------------------------------------------------------------------------------------------------------------------------------------------------------------------------------------------------------------------------------------|

\*Note: “flow cell” refers to port #6 and “micro-column” refers to port #2. For the sake of graphic presentation, the time necessary for loading beads (23 s) has been eliminated from all figures.

**Electronic Supplementary Information (Paper Ref.: B605112J)**

**Table 2. Software protocol for assay using micro-Bead Injection Spectroscopy**

|                                                                  |                                            |
|------------------------------------------------------------------|--------------------------------------------|
| <b>‘1) LOAD BEADS</b>                                            | Syringe pump Delay Until Done              |
| Syringe Pump Valve In                                            | Spectrometer Stop Scanning                 |
| Syringe Pump Flowrate ( $\mu\text{L}/\text{sec}$ ) 200           |                                            |
| Syringe Pump Aspirate ( $\mu\text{L}$ ) 400                      | <b>‘4) ELUTION #1</b>                      |
| Syringe Pump Delay Until Done                                    | Valve eluant                               |
| Valve beads                                                      | Syringe pump Flowrate (microliter/sec) 20  |
| Syringe Pump Valve Out                                           | Syringe pump Aspirate (microliter) 20      |
| Syringe Pump Flowrate ( $\mu\text{L}/\text{sec}$ ) 5             | Syringe pump Delay Until Done              |
| Syringe Pump Aspirate ( $\mu\text{L}$ ) 5                        | Valve flow cell                            |
| Syringe Pump Delay Until Done                                    | Spectrometer Absorbance Scanning           |
| Valve flow cell                                                  | Syringe pump Flowrate (microliter/sec) 1   |
| Syringe Pump Flowrate ( $\mu\text{L}/\text{sec}$ ) 5             | Syringe pump Dispense (microliter) 100     |
| Syringe Pump Dispense ( $\mu\text{L}$ ) 5                        | Syringe pump Delay Until Done              |
| Syringe Pump Delay Until Done                                    | Spectrometer Stop Scanning                 |
| Valve waste                                                      |                                            |
| Syringe Pump Flowrate (microliter/sec) 200                       | <b>‘5) ELUTION #2</b>                      |
| Syringe Pump Dispense (microliter) 300                           | Valve eluant                               |
| Syringe Pump Delay Until Done                                    | Syringe pump Flowrate (microliter/sec) 20  |
| Valve flow cell                                                  | Syringe pump Aspirate (microliter) 20      |
| Syringe Pump Flowrate (microliter/sec) 10                        | Syringe pump Delay Until Done              |
| Syringe Pump Empty                                               | Valve flow cell                            |
| Syringe Pump Delay Until Done                                    | Spectrometer Absorbance Scanning           |
|                                                                  | Syringe pump Flowrate (microliter/sec) 1   |
| <b>‘2) WASH FLOW CELL AND PERFORM REFERENCE SCAN DURING FLOW</b> | Syringe pump Dispense (microliter) 100     |
| Syringe pump Valve In                                            | Syringe pump Delay Until Done              |
| Syringe pump Flowrate (microliter/sec) 200                       | Spectrometer Stop Scanning                 |
| Syringe pump Fill                                                | Valve waste                                |
| Syringe pump Delay Until Done                                    | Syringe pump Flowrate (microliter/sec) 100 |
| Syringe pump Valve Out                                           | Syringe pump Empty                         |
| Valve flow cell                                                  | Syringe pump Delay Until Done              |
| Syringe pump Flowrate (microliter/sec) 1                         |                                            |
| Syringe pump Dispense (microliter) 20                            | <b>‘6) REMOVE BEADS</b>                    |
| Delay (sec) 10                                                   | Syringe Pump Valve In                      |
| Spectrometer Reference Scan                                      | Syringe Pump Flowrate (microliter/sec) 200 |
| Syringe pump Delay Until Done                                    | Syringe Pump Aspirate (microliter) 300     |
|                                                                  | Syringe Pump Delay Until Done              |
| <b>‘3) LOAD &amp; MONITOR SAMPLE</b>                             | Syringe Pump Valve Out                     |
| Valve sample                                                     | Valve flow cell                            |
| Syringe pump Flowrate (microliter/sec) 20                        | Syringe Pump Flowrate (microliter/sec) 20  |
| Syringe pump Aspirate (microliter) 20                            | Syringe Pump Aspirate (microliter) 100     |
| Syringe pump Delay Until Done                                    | Syringe Pump Delay Until Done              |
| Valve flow cell                                                  | Valve waste                                |
| Spectrometer Absorbance Scanning                                 | Syringe Pump Flowrate (microliter/sec) 200 |
| Syringe pump Flowrate (microliter/sec) 1                         | Syringe Pump Empty                         |
| Syringe pump Dispense (microliter) 100                           | Syringe Pump Delay Until Done              |

\*Note: “flow cell” refers to port #2. For the sake of graphic presentation, the time necessary for loading beads (33 s) has been eliminated from all figures.
